# Supplementary material
Source: HighWire-hosted journal article supplement (https://bmjopen.bmj.com/content/9/1/e020554)
Supplement: inline-supplementary-material-1 [file inline-supplementary-material-1.pdf]

A search was carried out on the following databases: CINAHL, Embase and MEDLINE. Database specific subject headings and relevant text words were used. Search strategies contained terms such as (Patient Readmission or readmission\* or readmit\* or rehospitalli\*) AND (Infant or Child or Adolescent or Pediatrics or child\* or infant\* or newborn\* or neonat\* paediatric\* or pediatric\* or adolescen\*).

## **Paediatric Readmission 2000-2017 Search Strategies**

### **MEDLINE (OvidSP) (searched 30/3/18)**

- 1 exp Patient Readmission/
- 2 rehospitalli\*.tw.
- 3 readmission\*.tw.
- 4 (hospital adj10 readmission\*).tw.
- 5 (unplanned adj10 readmission\*).tw.
- 6 (patient adj5 readmi\*).tw.
- 7 readmit\*.tw.
- 8 re-admission\*.tw.
- 9 (repeat\* adj5 hospital\*).tw.
- 10 1 or 2 or 3 or 4 or 5 or 6 or 7 or 8 or 9
- 11 exp Child/
- 12 exp Infant/
- 13 exp Adolescent/
- 14 (adolescen\* or teen\* or youth or juvenile\* or young person\* or young people\*).tw.
- 15 exp Pediatrics/
- 16 (child\* or infant\* or toddler\* or bab\* or newborn\* or neonat\* or school age\* or preschool or paediatric\* or pediatric\* or kid\* or boy\* or girl\*).tw.
- 17 11 or 12 or 13 or 14 or 15 or 16
- 18 10 and 17
- 19 limit 18 to yr="2000 - 2017"

### **Embase (OvidSP) (searched 30/3/18)**

- 1 exp hospital readmission/
- 2 rehospitalli\*.tw.
- 3 readmission\*.tw.
- 4 (hospital adj10 readmission\*).tw.

- 5 (unplanned adj10 readmission\*).tw.
- 6 (patient adj5 readmi\*).tw.
- 7 readmit\*.tw.
- 8 re-admission\*.tw.
- 9 (repeat\* adj5 hospital\*).tw.
- 10 1 or 2 or 3 or 4 or 5 or 6 or 7 or 8 or 9
- 11 child/
- 12 infant/
- 13 adolescent/
- 14 (child\* or infant\* or toddler\* or bab\* or newborn\* or neonat\* or school age\* or preschool or paediatric\* or pediatric\* or kid\* or boy\* or girl\*).tw.
- 15 (adolescen\* or teen\* or youth or juvenile\* or young person\* or young people\*).tw.
- 16 11 or 12 or 13 or 14 or 15
- 17 10 and 16
- 18 limit 18 to yr="2000 - 2017"

**CINAHL** (EBSCOhost) (searched 30/3/18)

- S14 S6 AND S12                      Limiters - Published Date: 20000101-20171231
- S13 S6 AND S12
- S12 child\* OR infant\* OR toddler\* OR bab\* OR newborn\* OR neonat\* OR school age\* OR preschool OR paediatric\* OR pediatric\* OR kid\* OR boy\* OR girl\*
- S11 (MH "Pediatrics+")
- S10 adolescen\* OR teen\* OR youth OR juvenile\* OR young person\* OR young people\*
- S9 (MH "Adolescence+")
- S8 (MH "Infant+") (MH "Child")
- S6 S1 OR S2 OR S3 OR S4 OR S5
- S5 re-admission\*
- S4 readmit\*
- S3 readmission\*
- S2 rehospitalli\*
- S1 (MH "Readmission")
